# Supplementary material for: A novel cost effective fabrication technique for highly preferential oriented TiO2 nanotubes
Source: Royal Society of Chemistry journal article supplement (doi:10.1039/c5nr06328k), 2015-01-01
Supplement: c5nr06328k1.pdf [file c5nr06328k1.pdf]

### Experimental Details

The anodization has been carried out at room temperature (27°C) for two hours at a constant voltage of 50V, in a two electrode system with mirror polished titanium foil both as working electrode and counter electrode and 0.5 wt % ammonium fluoride and 2 vol % de-ionized water in ethylene glycol as electrolyte. The distance between the working electrode and counter electrode is maintained at 3 cm. The surface deposited nanograss has been removed by ultrasonic cleaning in deionised water. The as prepared nanotubes are air annealed at 500°C for 3 hours. For Zn incorporation in the three electrode system, a negative voltage of 2.5V has been applied to the titanium dioxide nanotube with 1 M zinc sulphate solution as electrolyte for time periods ranging between 1s to 10s. The annealing of amorphous tubes in air is done at 500°C for 3 hours. For ZnO removal from surface, Zn-TONT has been dipped in 1 M HCl solution for one hour.

### Texture coefficient

The texture coefficient corresponding to each XRD peak is given in general by the equation 1 [1,2]

$$C_{hkl} = \frac{N(I_{hkl}/I_{r,hkl})}{\sum_{i=1}^N (I_{hkl}/I_{r,hkl})}$$

where N is the number of reflections in the XRD,  $C_{hkl}$  is the texture coefficient of plane (hkl),  $I_{hkl}$  is the measured integral intensity of the plane (hkl) under discussion,  $I_{r,hkl}$  is integral intensity for a sample with completely randomly oriented (hkl) plane (taken from the JCPDS file-89-4203). The texture coefficient  $C_{hkl}$  gives a measure of the enhancement of reflections from (hkl), in comparison with a completely randomly oriented sample. For randomly oriented samples, the texture coefficient is one. That means, a value of texture coefficient greater than one denotes the preferential orientation of that particular plane.

### **References**

- [1] G. Zoppi, K. Durose, S. J. C. Irvine, V. Barrioz, Grain and crystal texture properties of absorber layers in MOCVD-grown CdTe/CdS solar cells, *Semicond. Sci. Technol.*, 21 (2006) 763-770.
- [2] H. Moutinho H, M. Al-Jassim, D. H. Levi, P. C. Dippo, L. L. Kazmerski, *J. Vac. Sci. Technol. A*, 16 (1998) 1251-7.
